# Supplementary material
Source: PubMed Central journal article supplement (PMC4911286)

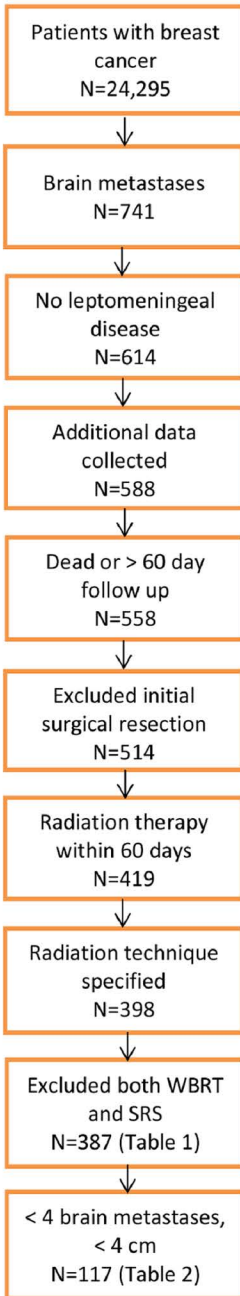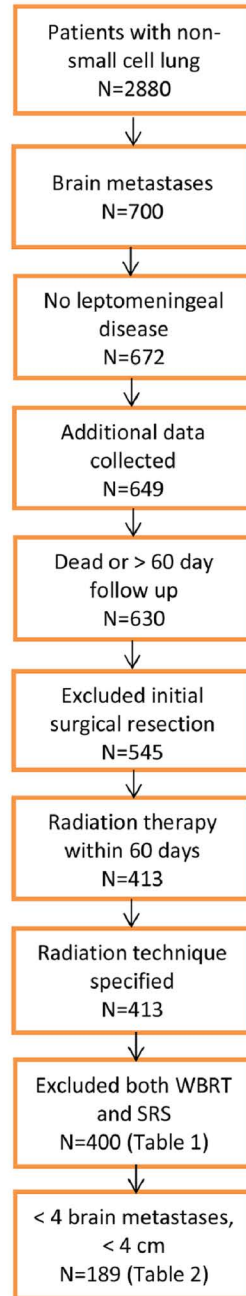

Supplement: NIHMS770721-supplement-01.pdf [file NIHMS770721-supplement-01.pdf]
